# Supplementary material
Source: HighWire-hosted journal article supplement (https://tobaccocontrol.bmj.com/content/33/3/360)
Supplement: inline-supplementary-material-1 [file inline-supplementary-material-1.pdf]

Table S1. Films included from 2001 to 2020

| Number | Year of release | Film                 | Origin      | Running time (min) | Intervals |
|--------|-----------------|----------------------|-------------|--------------------|-----------|
| 1      | 2001            | Pearl Harbor         | America     | 183                | 36        |
| 2      | 2001            | Happy Funeral        | China       | 103                | 20        |
| 3      | 2001            | The Accidental Spy   | China       | 108                | 21        |
| 4      | 2001            | Roots and Branches   | China       | 95                 | 19        |
| 5      | 2001            | The Munny 2          | America     | 130                | 26        |
| 6      | 2001            | Vertical Limit       | America     | 124                | 24        |
| 7      | 2001            | The Legend of Zu     | China       | 104                | 20        |
| 8      | 2001            | Enemy at the Gates   | the UK      | 131                | 26        |
| 9      | 2001            | Rush Hour 2          | America     | 90                 | 18        |
| 10     | 2001            | Swordfish            | America     | 99                 | 19        |
| 11     | 2001            | Tomb Raider          | America     | 100                | 20        |
| 12     | 2001            | Charlie's Angels     | America     | 98                 | 19        |
| 13     | 2001            | Moulin Rouge         | Australia   | 127                | 25        |
| 14     | 2001            | Pavilion of Women    | China       | 116                | 23        |
| 15     | 2001            | Para Para Sakura     | China       | 96                 | 19        |
| 16     | 2001            | Proof of Life        | America     | 135                | 27        |
| 17     | 2001            | The Bone Collector   | America     | 118                | 23        |
| 18     | 2001            | The Mask of Zorro    | America     | 136                | 27        |
| 19     | 2001            | Gua Sha Treatment    | China       | 100                | 20        |
| 20     | 2001            | China Strike Force   | China       | 103                | 20        |
| 21     | 2002            | Hero                 | China       | 93                 | 18        |
| 22     | 2002            | The Lord of the Ring | New Zealand | 179                | 35        |

|    |      |                                          |         |     |    |
|----|------|------------------------------------------|---------|-----|----|
| 23 | 2002 | Harry Potter and the Philosopher's Stone | America | 152 | 30 |
| 24 | 2002 | Prequel Trilogy                          | America | 144 | 28 |
| 25 | 2002 | Spider-Man                               | America | 121 | 24 |
| 26 | 2002 | Windtalkers                              | America | 134 | 26 |
| 27 | 2002 | Legend of Divine Mountain                | China   | 103 | 20 |
| 28 | 2002 | Impossible II                            | America | 123 | 24 |
| 29 | 2002 | Chinese Odyssey                          | China   | 95  | 19 |
| 30 | 2002 | The Lion Roars                           | China   | 100 | 20 |
| 31 | 2002 | Zhou Yu's Train                          | China   | 96  | 19 |
| 32 | 2002 | Jurassic Park III                        | America | 92  | 18 |
| 33 | 2002 | Stuart Little                            | America | 77  | 15 |
| 34 | 2002 | Bad Company                              | America | 116 | 23 |
| 35 | 2002 | The Crimson Rivers                       | France  | 106 | 21 |
| 36 | 2002 | The Tuxedo                               | America | 99  | 19 |
| 37 | 2002 | Marry A Rich Man                         | China   | 93  | 18 |
| 38 | 2002 | The One                                  | America | 87  | 17 |
| 39 | 2002 | Together                                 | China   | 116 | 23 |
| 40 | 2002 | I Love You                               | China   | 97  | 19 |
| 41 | 2003 | Cell Phone                               | China   | 107 | 21 |
| 42 | 2003 | Harry Potter And the Chamber of Secrets  | the UK  | 161 | 32 |
| 43 | 2003 | The Matrix Revolutions                   | America | 129 | 25 |
| 44 | 2003 | The Matrix Reloaded                      | America | 138 | 27 |
| 45 | 2003 | Warriors of Heaven and Earth             | China   | 120 | 24 |
| 46 | 2003 | Infernal Affairs 3                       | China   | 117 | 23 |

|    |      |                                          |         |     |    |
|----|------|------------------------------------------|---------|-----|----|
| 47 | 2003 | Finding Nemo                             | America | 100 | 20 |
| 48 | 2003 | Terminator 3: Rise of the Machines       | America | 109 | 21 |
| 49 | 2003 | Pirates of the Caribbean                 | America | 143 | 28 |
| 50 | 2003 | The Medallion                            | China   | 88  | 17 |
| 51 | 2003 | The Lord of the Rings: The Two Towers    | America | 179 | 35 |
| 52 | 2003 | Cat and Mouse                            | China   | 92  | 18 |
| 53 | 2003 | The Recruit                              | America | 115 | 23 |
| 54 | 2003 | The Italian Job                          | America | 111 | 22 |
| 55 | 2003 | Charlie's Angels 2                       | America | 106 | 21 |
| 56 | 2003 | Running On Karma                         | China   | 92  | 18 |
| 57 | 2003 | Welcome to the Punch                     | China   | 100 | 20 |
| 58 | 2003 | Shanghai Knights 2                       | America | 114 | 22 |
| 59 | 2003 | Catch Me If You Can                      | America | 141 | 28 |
| 60 | 2003 | Xiaoping Deng                            | China   | 110 | 22 |
| 61 | 2004 | Kung Fu Hustle                           | China   | 100 | 20 |
| 62 | 2004 | House of Flying Daggers                  | China   | 119 | 23 |
| 63 | 2004 | A World Without Thieves                  | China   | 121 | 24 |
| 64 | 2004 | The Lord of the Ring 3                   | America | 201 | 40 |
| 65 | 2004 | The Day After Tomorrow                   | America | 124 | 24 |
| 66 | 2004 | Troy                                     | America | 196 | 39 |
| 67 | 2004 | Spider-Man 2                             | America | 127 | 25 |
| 68 | 2004 | New Police Story                         | China   | 123 | 24 |
| 69 | 2004 | Side Zhang                               | China   | 110 | 22 |
| 70 | 2004 | Harry Potter and the Prisoner of Azkaban | the UK  | 141 | 28 |

|    |      |                                              |             |     |    |
|----|------|----------------------------------------------|-------------|-----|----|
| 71 | 2004 | King Arthur                                  | America     | 142 | 28 |
| 72 | 2004 | Cold Mountain                                | the UK      | 154 | 30 |
| 73 | 2004 | The Twins Effect II                          | China       | 106 | 21 |
| 74 | 2004 | Master and Commander                         | America     | 138 | 27 |
| 75 | 2004 | The Game of Killing                          | China       | 92  | 18 |
| 76 | 2004 | Garfield                                     | America     | 80  | 16 |
| 77 | 2004 | S.W.A.T.                                     | America     | 117 | 23 |
| 78 | 2004 | Baober in Love                               | China       | 95  | 19 |
| 79 | 2004 | I, Robot                                     | America     | 115 | 23 |
| 80 | 2004 | Yesterday and More                           | China       | 98  | 19 |
| 81 | 2005 | The Promise                                  | China       | 121 | 24 |
| 82 | 2005 | King Kong                                    | New Zealand | 187 | 37 |
| 83 | 2005 | The Myth                                     | China       | 122 | 24 |
| 84 | 2005 | Harry Potter and the Goblet of Fire          | the UK      | 157 | 31 |
| 85 | 2005 | Seven Swords                                 | China       | 153 | 30 |
| 86 | 2005 | Star Wars: Episode III - Revenge of the Sith | America     | 140 | 28 |
| 87 | 2005 | Initial D: First Stage                       | China       | 109 | 21 |
| 88 | 2005 | Mr and Mrs Smith                             | America     | 120 | 24 |
| 89 | 2005 | World War                                    | America     | 116 | 23 |
| 90 | 2005 | A Chinese Tall Story                         | China       | 103 | 20 |
| 91 | 2005 | Seoul Raiders                                | China       | 95  | 19 |
| 92 | 2005 | National Treasure                            | America     | 131 | 26 |
| 93 | 2005 | The Legend of Zorro                          | America     | 129 | 25 |
| 94 | 2005 | Perhaps Love                                 | China       | 108 | 21 |

|     |      |                                                                |         |     |    |
|-----|------|----------------------------------------------------------------|---------|-----|----|
| 95  | 2005 | Riding Alone for Thousands of Miles                            | China   | 107 | 21 |
| 96  | 2005 | Madagascar                                                     | America | 86  | 17 |
| 97  | 2005 | The Interpreter                                                | America | 128 | 25 |
| 98  | 2005 | Stealth                                                        | America | 121 | 24 |
| 99  | 2005 | Changxia Ren                                                   | China   | 104 | 20 |
| 100 | 2005 | Anacondas:The Hunt For the Blood Orchid                        | America | 97  | 19 |
| 101 | 2006 | Curse of the Golden Flower                                     | China   | 114 | 22 |
| 102 | 2006 | The Banquet                                                    | China   | 131 | 26 |
| 103 | 2006 | The Da Vinci Code                                              | America | 149 | 29 |
| 104 | 2006 | Fearless                                                       | China   | 100 | 20 |
| 105 | 2006 | Rob-B-Hood                                                     | China   | 125 | 25 |
| 106 | 2006 | Mission: Impossible III                                        | America | 126 | 25 |
| 107 | 2006 | Confession of Pain                                             | China   | 110 | 22 |
| 108 | 2006 | Poseidon                                                       | America | 98  | 19 |
| 109 | 2006 | Battle of Wits                                                 | China   | 133 | 26 |
| 110 | 2006 | Night at the Museum                                            | America | 108 | 21 |
| 111 | 2006 | The Chronicles of Narnia: The Lion, the Witch and the Wardrobe | the UK  | 143 | 28 |
| 112 | 2006 | Superman Returns                                               | America | 154 | 30 |
| 113 | 2006 | Garfield: A Tail of Two Kitties                                | the UK  | 78  | 15 |
| 114 | 2006 | Eight Below                                                    | America | 120 | 24 |
| 115 | 2006 | Dragon Tiger Gate                                              | China   | 94  | 18 |
| 116 | 2006 | Ice Age: The Meltdown                                          | America | 91  | 18 |
| 117 | 2006 | The Knot                                                       | China   | 117 | 23 |

|     |      |                                           |         |     |    |
|-----|------|-------------------------------------------|---------|-----|----|
| 118 | 2006 | The Transporter                           | France  | 92  | 18 |
| 119 | 2006 | Miami Vice                                | America | 134 | 26 |
| 120 | 2006 | Crazy Stone                               | China   | 98  | 19 |
| 121 | 2007 | Transformers                              | America | 144 | 28 |
| 122 | 2007 | The Assembly                              | China   | 124 | 24 |
| 123 | 2007 | The Warlords                              | China   | 126 | 25 |
| 124 | 2007 | Spider-Man 3                              | America | 139 | 27 |
| 125 | 2007 | Harry Potter and the Order of the Phoenix | the UK  | 138 | 27 |
| 126 | 2007 | Lust, Caution                             | China   | 158 | 31 |
| 127 | 2007 | Pirates of the Caribbean: At World's End  | America | 169 | 33 |
| 128 | 2007 | Casino Royale                             | the UK  | 144 | 28 |
| 129 | 2007 | Protege                                   | China   | 108 | 21 |
| 130 | 2007 | Eragon                                    | America | 104 | 20 |
| 131 | 2007 | Invisible Target                          | China   | 129 | 25 |
| 132 | 2007 | Teenage Mutant Ninja Turtles              | China   | 87  | 17 |
| 133 | 2007 | Secret                                    | China   | 101 | 20 |
| 134 | 2007 | Crossed Lines                             | China   | 111 | 22 |
| 135 | 2007 | Flash Point                               | China   | 88  | 17 |
| 136 | 2007 | Blood Brothers                            | China   | 95  | 19 |
| 137 | 2007 | Brothers                                  | China   | 93  | 18 |
| 138 | 2007 | The Iron Triangle                         | China   | 93  | 18 |
| 139 | 2007 | Ghost Rider                               | America | 114 | 22 |
| 140 | 2007 | Live Free or Die Hard                     | America | 128 | 25 |
| 141 | 2008 | Red Cliff                                 | China   | 146 | 29 |

|     |      |                                            |         |     |    |
|-----|------|--------------------------------------------|---------|-----|----|
| 142 | 2008 | If You Are the One                         | China   | 130 | 26 |
| 143 | 2008 | Painted Skin                               | China   | 118 | 23 |
| 144 | 2008 | A Hope                                     | China   | 86  | 17 |
| 145 | 2008 | The Forbidden Kingdom                      | America | 104 | 20 |
| 146 | 2008 | Kung Fu Panda                              | America | 95  | 19 |
| 147 | 2008 | Quantum of Solace                          | the UK  | 106 | 21 |
| 148 | 2008 | Forever Enthralled                         | China   | 147 | 29 |
| 149 | 2008 | Kongfu Dunk                                | China   | 99  | 19 |
| 150 | 2008 | The Mummy: Tomb of the Dragon Emperor      | America | 112 | 22 |
| 151 | 2008 | Hancock                                    | America | 92  | 18 |
| 152 | 2008 | IP Man                                     | China   | 106 | 21 |
| 153 | 2008 | Iron Man                                   | America | 126 | 25 |
| 154 | 2008 | The Chronicles of Narnia: Prince Caspian   | America | 150 | 30 |
| 155 | 2008 | Wanted                                     | America | 110 | 22 |
| 156 | 2008 | Three Kingdoms: Resurrection of the Dragon | China   | 102 | 20 |
| 157 | 2008 | National Treasure: Book of Secrets         | America | 124 | 24 |
| 158 | 2008 | Journey to the Center of the Earth         | America | 93  | 18 |
| 159 | 2008 | The Incredible Hulk                        | America | 112 | 22 |
| 160 | 2008 | Shi Quan Jiu Mei                           | China   | 92  | 18 |
| 161 | 2009 | 2012                                       | America | 158 | 31 |
| 162 | 2009 | Transformers: Revenge of the Fallen        | America | 150 | 30 |
| 163 | 2009 | The Founding of a Republic                 | China   | 138 | 27 |
| 164 | 2009 | Bodyguards and Assassins                   | China   | 139 | 27 |

|     |      |                                                    |         |     |    |
|-----|------|----------------------------------------------------|---------|-----|----|
| 165 | 2009 | A Woman, a Gun and a Noodle Shop                   | China   | 95  | 19 |
| 166 | 2009 | Red Cliff                                          | China   | 142 | 28 |
| 167 | 2009 | The Message                                        | China   | 118 | 23 |
| 168 | 2009 | City of Life and Death                             | China   | 132 | 26 |
| 169 | 2009 | Harry Potter and the Half-Blood Prince             | the UK  | 153 | 30 |
| 170 | 2009 | Ice Age: Dawn of the Dinosaurs                     | America | 94  | 18 |
| 171 | 2009 | G.I. Joe: The Rise of Cobra                        | America | 118 | 23 |
| 172 | 2009 | Night at the Museum: Battle of the Smithsonian     | America | 105 | 21 |
| 173 | 2009 | Terminator Salvation                               | America | 115 | 23 |
| 174 | 2009 | Crazy Racer                                        | China   | 104 | 20 |
| 175 | 2009 | look for a star                                    | China   | 117 | 23 |
| 176 | 2009 | On His Majesty's Secret Service                    | China   | 98  | 19 |
| 177 | 2009 | Sophie's Revenge                                   | China   | 107 | 21 |
| 178 | 2009 | Up                                                 | America | 96  | 19 |
| 179 | 2009 | Overheard                                          | China   | 100 | 20 |
| 180 | 2009 | Mulan                                              | America | 115 | 23 |
| 181 | 2010 | Avatar                                             | America | 162 | 32 |
| 182 | 2010 | Let the bullets fly                                | China   | 132 | 26 |
| 183 | 2010 | Tang Shan Earthquake                               | China   | 139 | 27 |
| 184 | 2010 | If You Are The One 2                               | China   | 122 | 24 |
| 185 | 2010 | Inception                                          | America | 148 | 29 |
| 186 | 2010 | Detective Dee and the Mystery of the Phantom Flame | China   | 123 | 24 |
| 187 | 2010 | Alice in Wonderland                                | America | 108 | 21 |
| 188 | 2010 | Harry Potter and the Deathly Hallows: Part 1       | the UK  | 146 | 29 |



|     |      |                                              |         |     |    |
|-----|------|----------------------------------------------|---------|-----|----|
| 189 | 2010 | Ip Man 2                                     | China   | 108 | 21 |
| 190 | 2010 | The Expendables                              | America | 103 | 20 |
| 191 | 2010 | Sacrifice                                    | China   | 128 | 25 |
| 192 | 2010 | Iron Man 2                                   | America | 124 | 24 |
| 193 | 2010 | Clash of the Titans                          | America | 106 | 21 |
| 194 | 2010 | Prince of Persia: The Sands of Time          | America | 116 | 23 |
| 195 | 2010 | Just call me nobody                          | China   | 93  | 18 |
| 196 | 2010 | Little Big Soldier                           | China   | 96  | 19 |
| 197 | 2010 | Under the Hawthorn Tree                      | China   | 114 | 22 |
| 198 | 2010 | Resident Evil: Afterlife                     | America | 97  | 19 |
| 199 | 2010 | 14 Blades                                    | China   | 112 | 22 |
| 200 | 2010 | The Legend Of Chen Zhen                      | China   | 106 | 21 |
| 201 | 2011 | Transformers: Dark of the Moon               | America | 154 | 30 |
| 202 | 2011 | Kung Fu Panda 2                              | America | 91  | 18 |
| 203 | 2011 | Pirates of the Caribbean: On Stranger Tides  | America | 136 | 27 |
| 204 | 2011 | The Flowers Of War                           | China   | 145 | 29 |
| 205 | 2011 | Beginning Of The Great Revival               | China   | 124 | 24 |
| 206 | 2011 | Harry Potter and the Deathly Hallows: Part 2 | America | 130 | 26 |
| 207 | 2011 | Flying Swords of Dragon Gate                 | China   | 122 | 24 |
| 208 | 2011 | Love is Not Blind                            | China   | 110 | 22 |
| 209 | 2011 | The Smurfs                                   | America | 103 | 20 |
| 210 | 2011 | Fast Five                                    | America | 130 | 26 |
| 211 | 2011 | Battle: Los Angeles                          | America | 116 | 23 |
| 212 | 2011 | Shaolin                                      | China   | 132 | 26 |

|     |      |                                      |         |     |    |
|-----|------|--------------------------------------|---------|-----|----|
| 213 | 2011 | Overheard 2                          | China   | 117 | 23 |
| 214 | 2011 | Eternal Moment                       | China   | 103 | 20 |
| 215 | 2011 | My Own Swordsman The Movie           | China   | 92  | 18 |
| 216 | 2011 | Rise of the Planet of the Apes       | America | 105 | 21 |
| 217 | 2011 | Swordsmen                            | China   | 115 | 23 |
| 218 | 2011 | The Sorcerer and the White Snake     | China   | 103 | 20 |
| 219 | 2011 | All's Well Ends Well 2011            | China   | 103 | 20 |
| 220 | 2011 | Let The Bullets Fly                  | China   | 132 | 26 |
| 221 | 2012 | Lost in Thailand                     | China   | 105 | 21 |
| 222 | 2012 | Titanic 3D                           | America | 194 | 38 |
| 223 | 2012 | Painted Skin II                      | China   | 135 | 27 |
| 224 | 2012 | Mission: Impossible - Ghost Protocol | America | 133 | 26 |
| 225 | 2012 | Life of Pi                           | America | 127 | 25 |
| 226 | 2012 | The Avengers                         | America | 142 | 28 |
| 227 | 2012 | Chinese Zodiac                       | China   | 122 | 24 |
| 228 | 2012 | Men in Black III                     | America | 103 | 20 |
| 229 | 2012 | Ice Age: Continental Drift           | America | 88  | 17 |
| 230 | 2012 | Journey 2: The Mysterious Island     | America | 94  | 18 |
| 231 | 2012 | Back to 1942                         | China   | 146 | 29 |
| 232 | 2012 | The Dark Knight Rises                | America | 165 | 33 |
| 233 | 2012 | The Expendables 2                    | America | 102 | 20 |
| 234 | 2012 | The Amazing Spider-Man               | America | 136 | 27 |
| 235 | 2012 | Battleship                           | America | 132 | 26 |
| 236 | 2012 | John Carter                          | America | 132 | 26 |

|     |      |                                             |         |      |    |
|-----|------|---------------------------------------------|---------|------|----|
| 237 | 2012 | Cold War                                    | China   | 102  | 20 |
| 238 | 2012 | The Silent War                              | China   | 120  | 24 |
| 239 | 2012 | Prometheus                                  | America | 124  | 24 |
| 240 | 2012 | The Bourne Legacy                           | America | 1335 | 27 |
| 241 | 2013 | Journey to the West: Conquering the Demons  | China   | 110  | 22 |
| 242 | 2013 | Iron Man 3                                  | America | 134  | 26 |
| 243 | 2013 | So Young                                    | China   | 132  | 26 |
| 244 | 2013 | Pacific Rim                                 | America | 131  | 26 |
| 245 | 2013 | Young Detective Dee: Rise of the Sea Dragon | China   | 133  | 26 |
| 246 | 2013 | Personal Tailor                             | China   | 118  | 23 |
| 247 | 2013 | American Dreams in China                    | China   | 112  | 22 |
| 248 | 2013 | Finding Mr. Right                           | China   | 123  | 24 |
| 249 | 2013 | Tiny Times 1.0                              | China   | 116  | 23 |
| 250 | 2013 | Gravity                                     | America | 91   | 18 |
| 251 | 2013 | Wild Speed: Euro Mission                    | America | 130  | 26 |
| 252 | 2013 | The Croods                                  | America | 98   | 19 |
| 253 | 2013 | Man of Steel                                | America | 143  | 28 |
| 254 | 2013 | Skyfall                                     | America | 143  | 28 |
| 255 | 2013 | Star Trek Into Darkness                     | America | 132  | 26 |
| 256 | 2013 | Jurassic Park 3D                            | America | 127  | 25 |
| 257 | 2013 | Chinese Zodiac                              | China   | 122  | 24 |
| 258 | 2013 | Police Story 2013                           | China   | 108  | 21 |
| 259 | 2013 | Thor: The Dark World                        | America | 112  | 22 |
| 260 | 2013 | G.I. Joe: Retaliation                       | America | 107  | 21 |

|     |      |                                     |         |     |    |
|-----|------|-------------------------------------|---------|-----|----|
| 261 | 2014 | Transformers: Age of Extinction     | America | 166 | 33 |
| 262 | 2014 | Breakup Buddies                     | China   | 118 | 23 |
| 263 | 2014 | The Monkey King                     | China   | 119 | 23 |
| 264 | 2014 | Interstellar                        | America | 169 | 33 |
| 265 | 2014 | X-Men: Days of Future Past          | America | 132 | 26 |
| 266 | 2014 | Captain America: The Winter Soldier | America | 136 | 27 |
| 267 | 2014 | Dawn of the Planet of the Apes      | America | 130 | 26 |
| 268 | 2014 | Dad, Where Are We Going?            | China   | 89  | 17 |
| 269 | 2014 | The Breakup Guru                    | China   | 116 | 23 |
| 270 | 2014 | The Continent                       | China   | 104 | 20 |
| 271 | 2014 | Guardians of the Galaxy             | America | 121 | 24 |
| 272 | 2014 | The Amazing Spider-Man 2            | America | 142 | 28 |
| 273 | 2014 | Back in Time                        | China   | 119 | 23 |
| 274 | 2014 | The Man from Macau                  | China   | 93  | 18 |
| 275 | 2014 | Tiny Time 3.0                       | China   | 126 | 25 |
| 276 | 2014 | Gone With the Bullets               | China   | 140 | 28 |
| 277 | 2014 | Godzilla                            | America | 123 | 24 |
| 278 | 2014 | The Hobbit: The Desolation of Smaug | America | 161 | 32 |
| 279 | 2014 | My Old Classmate                    | China   | 98  | 19 |
| 280 | 2014 | The Expendables 3                   | America | 126 | 25 |
| 281 | 2015 | Monster Hunt                        | China   | 118 | 23 |
| 282 | 2015 | Furious 7                           | America | 137 | 27 |
| 283 | 2015 | Lost In Hong Kong                   | China   | 114 | 22 |
| 284 | 2015 | Avengers: Age of Ultron             | America | 141 | 28 |

|     |      |                                           |         |      |    |
|-----|------|-------------------------------------------|---------|------|----|
| 285 | 2015 | Goodbye Mr. Loser                         | China   | 1004 | 20 |
| 286 | 2015 | Jurassic World                            | America | 124  | 24 |
| 287 | 2015 | The Ghouls                                | China   | 125  | 25 |
| 288 | 2015 | Jian Bing Man                             | China   | 113  | 22 |
| 289 | 2015 | The Man from Macau 2                      | China   | 110  | 22 |
| 290 | 2015 | Monkey King: Hero is Back                 | China   | 89   | 17 |
| 291 | 2015 | Mission: Impossible - Rogue Nation        | China   | 131  | 26 |
| 292 | 2015 | The Hobbit: The Battle of the Five Armies | America | 144  | 28 |
| 293 | 2015 | Dragon Blade                              | China   | 127  | 25 |
| 294 | 2015 | Terminator Genisys                        | America | 126  | 25 |
| 295 | 2015 | Wolf Totem                                | China   | 121  | 24 |
| 296 | 2015 | Chronicles of the Ghostly Tribe           | China   | 115  | 23 |
| 297 | 2015 | Ant-Man                                   | America | 117  | 23 |
| 298 | 2015 | San Andreas                               | America | 114  | 22 |
| 299 | 2015 | Devil and Angel                           | China   | 124  | 24 |
| 300 | 2015 | The Martian                               | America | 144  | 28 |
| 301 | 2016 | The Mermaid                               | China   | 93   | 18 |
| 302 | 2016 | Zootopia                                  | America | 109  | 21 |
| 303 | 2016 | Warcraft                                  | America | 124  | 24 |
| 304 | 2016 | Captain America: Civil War                | America | 148  | 29 |
| 305 | 2016 | The Monkey King 2                         | China   | 120  | 24 |
| 306 | 2016 | Operation Mekong                          | China   | 124  | 24 |
| 307 | 2016 | From Vegas to Macau 3                     | China   | 112  | 22 |
| 308 | 2016 | Time Raiders                              | China   | 123  | 24 |

|     |      |                                                  |         |     |    |
|-----|------|--------------------------------------------------|---------|-----|----|
| 309 | 2016 | Kung Fu Panda 3                                  | America | 95  | 19 |
| 310 | 2016 | The Great Wall                                   | China   | 104 | 20 |
| 311 | 2016 | The Jungle Book                                  | the UK  | 106 | 21 |
| 312 | 2016 | Skiptrace                                        | China   | 111 | 22 |
| 313 | 2016 | Star Wars: The Force Awakens                     | America | 135 | 27 |
| 314 | 2016 | I Belonged to You                                | China   | 113 | 22 |
| 315 | 2016 | X-Men: Apocalypse                                | America | 144 | 28 |
| 316 | 2016 | Book of love                                     | China   | 131 | 26 |
| 317 | 2016 | Ip Man 3                                         | China   | 105 | 21 |
| 318 | 2016 | Doctor Strange                                   | America | 115 | 23 |
| 319 | 2016 | DETECTIVE CHINATOWN                              | China   | 135 | 27 |
| 320 | 2016 | Cold War II                                      | China   | 110 | 22 |
| 321 | 2017 | Wolf Warriors II                                 | China   | 123 | 24 |
| 322 | 2017 | The Fate of the Furious                          | China   | 136 | 27 |
| 323 | 2017 | NEVER SAY DIE                                    | China   | 100 | 20 |
| 324 | 2017 | Kung Fu Yoga                                     | China   | 108 | 21 |
| 325 | 2017 | Journey to the West: The Demons Strike Back      | China   | 108 | 21 |
| 326 | 2017 | Transformers: The Last Knight                    | America | 150 | 30 |
| 327 | 2017 | Wrestling Competition                            | India   | 140 | 28 |
| 328 | 2017 | Youth                                            | China   | 136 | 27 |
| 329 | 2017 | Pirates of the Caribbean: Dead Men Tell No Tales | America | 129 | 25 |
| 330 | 2017 | Kong: Skull Island                               | America | 119 | 23 |
| 331 | 2017 | Coco                                             | America | 105 | 21 |
| 332 | 2017 | xXx: Return of Xander Cage                       | America | 107 | 21 |

|     |      |                                     |         |     |    |
|-----|------|-------------------------------------|---------|-----|----|
| 333 | 2017 | Resident Evil: The Final Chapter    | America | 99  | 19 |
| 334 | 2017 | Duckweed                            | China   | 102 | 20 |
| 335 | 2017 | Despicable Me 3                     | America | 90  | 18 |
| 336 | 2017 | Spider-Man: Homecoming              | America | 133 | 26 |
| 337 | 2017 | Buddies in India                    | China   | 100 | 20 |
| 338 | 2017 | Thor: Ragnarok                      | America | 130 | 26 |
| 339 | 2017 | War for the Planet of the Apes      | America | 140 | 28 |
| 340 | 2017 | Logan                               | America | 123 | 24 |
| 341 | 2018 | OPERATION RED SEA                   | China   | 138 | 27 |
| 342 | 2018 | DETECTIVE CHINATOWN II              | China   | 121 | 24 |
| 343 | 2018 | Dying to Survive                    | China   | 117 | 23 |
| 344 | 2018 | Hello Mr. Billionaire               | China   | 118 | 23 |
| 345 | 2018 | Avengers: Infinity War              | America | 149 | 29 |
| 346 | 2018 | Monster Hunt 2                      | China   | 110 | 22 |
| 347 | 2018 | Venom                               | America | 107 | 21 |
| 348 | 2018 | Aquaman                             | America | 143 | 28 |
| 349 | 2018 | Jurassic World: Fallen Kingdom      | America | 128 | 25 |
| 350 | 2018 | The Ex-file: The Return Of The Exes | China   | 120 | 24 |
| 351 | 2018 | Ready Player One                    | America | 140 | 28 |
| 352 | 2018 | Us and Them                         | China   | 120 | 24 |
| 353 | 2018 | The Island                          | China   | 134 | 26 |
| 354 | 2018 | Project Gutenberg                   | China   | 130 | 26 |
| 355 | 2018 | Mission: Impossible - Fallout       | America | 148 | 29 |
| 356 | 2018 | The Meg                             | America | 115 | 23 |

|     |      |                                 |         |     |    |
|-----|------|---------------------------------|---------|-----|----|
| 357 | 2018 | Rampage                         | America | 107 | 21 |
| 358 | 2018 | How Long Will I Love U          | China   | 101 | 20 |
| 359 | 2018 | Ant-Man and the Wasp            | America | 119 | 23 |
| 360 | 2018 | A Cool Fish                     | China   | 108 | 21 |
| 361 | 2019 | Nezha: Birth of the Demon Child | China   | 110 | 22 |
| 362 | 2019 | The Wandering Earth             | China   | 125 | 25 |
| 363 | 2019 | The Avengers 4: Endgame         | America | 181 | 36 |
| 364 | 2019 | My People, My Country           | China   | 155 | 31 |
| 365 | 2019 | The Captain                     | China   | 111 | 22 |
| 366 | 2019 | Crazy Alien                     | China   | 116 | 23 |
| 367 | 2019 | Pegasus                         | China   | 98  | 19 |
| 368 | 2019 | The Bravest                     | China   | 120 | 24 |
| 369 | 2019 | Better Days                     | China   | 135 | 27 |
| 370 | 2019 | Hobbs and Shaw                  | America | 137 | 27 |
| 371 | 2019 | Spider-Man: Far From Home       | America | 127 | 25 |
| 372 | 2019 | The White Storm 2: Drug Lords   | China   | 99  | 19 |
| 373 | 2019 | Bumblebee                       | America | 114 | 22 |
| 374 | 2019 | The Climbers                    | China   | 125 | 25 |
| 375 | 2019 | Captain Marvel                  | America | 124 | 24 |
| 376 | 2019 | More Than Blue                  | China   | 106 | 21 |
| 377 | 2019 | Godzilla: King of the Monsters  | America | 132 | 26 |
| 378 | 2019 | Alita: Battle Angel             | America | 122 | 24 |
| 379 | 2019 | Looking Up                      | China   | 147 | 29 |
| 380 | 2019 | The Lion King                   | America | 118 | 23 |



|     |      |                          |         |     |    |
|-----|------|--------------------------|---------|-----|----|
| 381 | 2020 | The Eight Hundred        | China   | 147 | 29 |
| 382 | 2020 | My People My Homeland    | China   | 153 | 30 |
| 383 | 2020 | Legend of Deification    | China   | 110 | 22 |
| 384 | 2020 | The Sacrifice            | China   | 122 | 24 |
| 385 | 2020 | Duo Guan、 Leap           | China   | 135 | 27 |
| 386 | 2020 | Shock Wave 2             | China   | 121 | 24 |
| 387 | 2020 | Caught in Time           | China   | 95  | 19 |
| 388 | 2020 | Adoring                  | China   | 108 | 21 |
| 389 | 2020 | Love You Forever         | China   | 115 | 23 |
| 390 | 2020 | Sheep Without A Shepherd | China   | 112 | 22 |
| 391 | 2020 | Tenet                    | America | 144 | 28 |
| 392 | 2020 | The Rescue               | China   | 134 | 26 |
| 393 | 2020 | Ip Man4                  | China   | 107 | 21 |
| 394 | 2020 | Bath Buddy               | China   | 103 | 20 |
| 395 | 2020 | The Croods: A New Age    | America | 95  | 19 |
| 396 | 2020 | The End of Endless Love  | China   | 102 | 20 |
| 397 | 2020 | Coffee or Tea?           | China   | 97  | 19 |
| 398 | 2020 | Vanguard                 | China   | 108 | 21 |
| 399 | 2020 | Mulan                    | America | 115 | 23 |
| 400 | 2020 | A Little Red Flower      | China   | 128 | 25 |

**Table S2. The numbers of the films and intervals containing any tobacco imagery between Chinese and international films**

|           | Origin        | Tobacco imagery |              | $\chi^2$ | <i>P</i> |
|-----------|---------------|-----------------|--------------|----------|----------|
|           |               | With            | Without      |          |          |
| Films     | Chinese       | 148 (72.9%)     | 55 (27.1%)   | 29.666   | <0.001   |
|           | International | 91 (46.2%)      | 106 (53.8%)  |          |          |
| Intervals | Chinese       | 973 (21.4%)     | 3575 (78.6%) | 365.564  | <0.001   |
|           | International | 371 (7.6%)      | 4504 (92.4%) |          |          |

**Table S3. The films containing tobacco branding**

| Films                                       | Release year | Origin | Brands          | Branding intervals | Type of brands appearance                                    |
|---------------------------------------------|--------------|--------|-----------------|--------------------|--------------------------------------------------------------|
| The Accidental Spy                          | 2001         | China  | SALEM           | 1                  | Branded cigarette packs visible                              |
| Crazy Stone                                 | 2006         | China  | Hongta Mountain | 1                  | Characters mentioned brand                                   |
|                                             |              |        | Yuxi            | 1                  | Branded cigarette packs visible                              |
| Assembly                                    | 2007         | China  | Da Huang Long   | 1                  | Characters mentioned brand                                   |
|                                             |              |        | New China       | 1                  | Branded cigarette packs visible                              |
| Samsara                                     | 2007         | China  | Baoma           | 1                  | Branded cigarette packs visible & Characters mentioned brand |
| The Founding of a Republic                  | 2009         | China  | Baisha          | 1                  | Branded cigarette packs visible                              |
| Legend of the Fist: The Return of Chen Zhen |              | China  | Beauty          | 1                  | Advertisement in film                                        |
|                                             |              |        | Maskee          | 1                  | Branded cigarette packs visible & Characters mentioned brand |
| From Vegas to Macau                         | 2014         | China  | Marlboro        | 1                  | Branded cigarette packs visible                              |
| My old classmate                            | 2014         | China  | Liquan          | 1                  | Branded cigarette packs visible                              |
| The Bravest                                 | 2019         | China  | Hongta Mountain | 1                  | Branded cigarette packs visible                              |
| Better Days                                 | 2019         | China  | KENT            | 1                  | Branded cigarette packs visible                              |
| Caught in time                              | 2020         | China  | HILTON          | 1                  | Branded cigarette packs visible                              |
